# Supplementary material for: Changes in the Stability Landscape of a River Basin by Anthropogenic Droughts
Source: MDPI journal article supplement (doi:10.3390/w14182835), 2022-09-12
Supplement: s1 [file s1]

Archive with 1 entries (1 files):
- water-1878954-supplementary.pdf
